# Supplementary material for: Saliva Free Light Chains in Patients with Neuro-Sjögren
Source: MDPI journal article supplement (doi:10.3390/biomedicines10102470), 2022-10-03
Supplement: s1 [file s1]

**Supplemental Figure S1.** Correlations of saliva protein concentrations and quotients with ESSDAI total score.

ESSDAI = EULAR Sjögren's syndrome disease activity index, KFLC = kappa free light chains, LFLC = lambda free light chains, Q KFLC = saliva/serum KFLC concentration quotient, Q LFLC = saliva/serum LFLC concentration quotient. Linear regressions as well as correlations were not statistically significant.

**Supplemental Figure S2.** Correlations of saliva protein concentrations and quotients with ESSPRI total score.

ESSPRI = EULAR Sjögren's syndrome Patient Reported Index, KFLC = kappa free light chains, LFLC = lambda free light chains, Q KFLC = saliva/serum KFLC concentration quotient, Q LFLC = saliva/serum LFLC concentration quotient. Linear regressions as well as correlations were not statistically significant.

**Supplemental Figure S3.** Correlations of saliva protein concentrations and quotients with ESSPRI fatigue score.

ESSPRI = EULAR Sjögren's syndrome Patient Reported Index, KFLC = kappa free light chains, LFLC = lambda free light chains, Q KFLC = saliva/serum KFLC concentration quotient, Q LFLC = saliva/serum LFLC concentration quotient. Linear regressions as well as correlations were not statistically significant.

**Supplemental Figure S4.** Correlations of saliva protein concentrations and quotients with ESSPRI sicca score.

ESSPRI = EULAR Sjögren's syndrome Patient Reported Index, KFLC = kappa free light chains, LFLC = lambda free light chains, Q KFLC = saliva/serum KFLC concentration quotient, Q LFLC = saliva/serum LFLC concentration quotient. Linear regressions as well as correlations were not statistically significant.
