# Supplementary material for: Saliva Free Light Chains in Patients with Neuro-Sjögren
Source: Biomedicines. 2022 Oct 3;10(10):2470. doi: 10.3390/biomedicines10102470 (PMC9599066; doi:10.3390/biomedicines10102470)
Supplement: Supplementary file 1 [file biomedicines-10-02470-s001.zip]

Archive with 5 entries (5 files):
- Supplemental figure legend.pdf
- Supplemental Figure S1.tif
- Supplemental Figure S2.tif
- Supplemental Figure S3.tif
- Supplemental Figure S4.tif
